# Supplementary material for: Genome-wide identification and analysis of the evolution and expression pattern of the HVA22 gene family in three wild species of tomatoes
Source: PeerJ. 2023 Feb 13;11:e14844. doi: 10.7717/peerj.14844 (PMC9933743; doi:10.7717/peerj.14844)
Supplement: Table S1 [file peerj-11-14844-s002.xlsx]

## Sheet: Sheet1
Table S1. RT-PCR primers of SpiHVA22s
Gene	sequence(5' to 3')
Actin-F	CCACTACTGCTGAACGGGAA
Actin-R	ACCTGTCCATCTGGCAACTC
SpiHVA22c-F	AATTGCTTCTTAGCCCGCTT
SpiHVA22c-R	CCATATGCTGCCCAGTACAGA
SpiHVA22d-F	GGCTATTGAGACCAAATCCCC
SpiHVA22d-R	CCAGCAGGTCGCTATCAGTT
SpiHVA22g-F	ATGGCCAGACGAGGGTTTTC
SpiHV22g-R	ACGACCTCTACTGCTTTGCC
SpiHVA22k-F	TCTTGTTTGGCTTCAACTGCC
SpiHVA22k-R	GTGTCTGCGTAAAGCTCACC
SpiHVA22j-F	TGAGCAATGGCTTGCTTATTGG
SpiHVA22j-R	AAAAGCAGCTCCCCTGAACT
