# Supplementary material for: Genome-wide identification and analysis of the evolution and expression pattern of the HVA22 gene family in three wild species of tomatoes
Source: PeerJ. 2023 Feb 13;11:e14844. doi: 10.7717/peerj.14844 (PMC9933743; doi:10.7717/peerj.14844)
Supplement: Table S5 [file peerj-11-14844-s006.xlsx]

## Sheet: Sheet1
Table S5. Predicted Interaction Relationships Between HVA22 genes and Proteins
name	neighborhood_on_chromosome	gene_fusion	phylogenetic_cooccurrence	homology	coexpression	experimentally_determined_interaction	database_annotated	automated_textmining	combined_score
SlHVA22a(interacts with)SlHVA22n	0	0	0	0	0.19	0	0	0.319	0.424
SlHVA22a(interacts with)SlHVA22e	0	0	0	0	0.19	0	0	0.319	0.424
SlHVA22a(interacts with)SlHVA22j	0	0	0	0	0.19	0	0	0.319	0.424
SlHVA22a(interacts with)SlHVA22b	0	0	0	0	0.19	0	0	0.319	0.424
SlHVA22a(interacts with)SlHVA22i	0	0	0	0	0.19	0	0	0.319	0.424
SlHVA22a(interacts with)SlHVA22h	0	0	0	0	0.19	0	0	0.319	0.424
SlHVA22a(interacts with)SlHVA22k	0	0	0	0	0.19	0	0	0.319	0.424
SlHVA22a(interacts with)SlHVA22d	0	0	0	0	0.19	0	0	0.319	0.424
SlHVA22a(interacts with)SlHVA22l	0	0	0	0	0.19	0	0	0.319	0.424
SlHVA22a(interacts with)SlHVA22c	0	0	0	0	0.19	0	0	0.319	0.424
SlHVA22a(interacts with)SlHVA22f	0	0	0	0	0.19	0	0	0.319	0.424
SlHVA22a(interacts with)Ran binding protein 3	0	0	0	0	0.657	0	0	0	0.657
SlHVA22a(interacts with)RAN binding protein 3	0	0	0	0	0.657	0	0	0	0.657
SlHVA22a(interacts with)Ubiquitin-conjugating enzyme 13 E2	0	0	0	0	0.662	0.043	0	0	0.662
SlHVA22a(interacts with)Ubiquitin-conjugating enzyme 13 E2	0	0	0	0	0.662	0.043	0	0	0.662
SlHVA22a(interacts with)Ubiquitin-conjugating enzyme 13 E2	0	0	0	0	0.662	0.043	0	0	0.662
SlHVA22a(interacts with)Ubiquitin-conjugating enzyme 13 E2	0	0	0	0	0.662	0.043	0	0	0.662
SlHVA22a(interacts with)Eukaryotic translation initiation factor 1A	0	0	0	0	0.708	0	0	0	0.708
SlHVA22a(interacts with)Eukaryotic translation initiation factor 1A	0	0	0	0	0.708	0	0	0	0.708
SlHVA22a(interacts with)Eukaryotic translation initiation factor 1A	0	0	0	0	0.708	0	0	0	0.708
Eukaryotic translation initiation factor 3 subunit B(interacts with)Eukaryotic translation initiation factor 1A	0	0	0	0	0.156	0.894	0.687	0.468	0.983
Eukaryotic translation initiation factor 3 subunit B(interacts with)Solyc11g021130.1.1	0	0	0	0	0.745	0.888	0.686	0.11	0.99
Eukaryotic translation initiation factor 3 subunit B(interacts with)30S ribosomal protein S12 chloroplastic	0	0	0	0	0.745	0.888	0.686	0.11	0.99
Eukaryotic translation initiation factor 3 subunit B(interacts with)Eukaryotic translation initiation factor 1A	0	0	0	0	0.156	0.894	0.869	0.468	0.992
Eukaryotic translation initiation factor 3 subunit B(interacts with)Eukaryotic translation initiation factor 1A	0	0	0	0	0.156	0.894	0.869	0.468	0.992
Eukaryotic translation initiation factor 3 subunit B(interacts with)Eukaryotic translation initiation factor 2 beta subunit-like	0	0	0	0	0.823	0.953	0.893	0.782	0.999
Eukaryotic translation initiation factor 3 subunit B(interacts with)Eukaryotic translation initiation factor 3 subunit A	0	0	0	0	0.876	0.912	0.692	0.76	0.999
Eukaryotic translation initiation factor 3 subunit B(interacts with)Eukaryotic translation initiation factor 3 subunit A	0	0	0	0	0.876	0.912	0.692	0.76	0.999
Eukaryotic translation initiation factor 3 subunit B(interacts with)Eukaryotic translation initiation factor 2 alpha subunit family protein expressed	0	0	0	0	0.885	0.926	0.894	0.818	0.999
Eukaryotic translation initiation factor 1A(interacts with)Ran binding protein 3	0	0	0	0	0.439	0	0	0	0.439
Eukaryotic translation initiation factor 1A(interacts with)RAN binding protein 3	0	0	0	0	0.439	0	0	0	0.439
Eukaryotic translation initiation factor 1A(interacts with)SlHVA22m	0	0	0	0	0.708	0	0	0	0.708
Eukaryotic translation initiation factor 1A(interacts with)SlHVA22o	0	0	0	0	0.708	0	0	0	0.708
Eukaryotic translation initiation factor 1A(interacts with)SlHVA22g	0	0	0	0	0.708	0	0	0	0.708
Eukaryotic translation initiation factor 1A(interacts with)Ubiquitin-conjugating enzyme 13 E2	0	0	0	0	0.73	0	0	0	0.73
Eukaryotic translation initiation factor 1A(interacts with)Ubiquitin-conjugating enzyme 13 E2	0	0	0	0	0.73	0	0	0	0.73
Eukaryotic translation initiation factor 1A(interacts with)Ubiquitin-conjugating enzyme 13 E2	0	0	0	0	0.73	0	0	0	0.73
Eukaryotic translation initiation factor 1A(interacts with)Ubiquitin-conjugating enzyme 13 E2	0	0	0	0	0.73	0	0	0	0.73
Eukaryotic translation initiation factor 1A(interacts with)Eukaryotic translation initiation factor 3 subunit A	0	0	0	0	0.112	0.881	0.933	0.605	0.996
Eukaryotic translation initiation factor 1A(interacts with)Eukaryotic translation initiation factor 3 subunit A	0	0	0	0	0.112	0.881	0.933	0.605	0.996
Eukaryotic translation initiation factor 1A(interacts with)Solyc11g021130.1.1	0.165	0	0	0	0.837	0.89	0.681	0.513	0.997
Eukaryotic translation initiation factor 1A(interacts with)30S ribosomal protein S12 chloroplastic	0.165	0	0	0	0.837	0.89	0.681	0.513	0.997
Eukaryotic translation initiation factor 1A(interacts with)Eukaryotic translation initiation factor 2 alpha subunit family protein expressed	0	0	0	0	0.291	0.895	0.977	0.468	0.998
Eukaryotic translation initiation factor 1A(interacts with)Eukaryotic translation initiation factor 2 beta subunit-like	0.161	0	0	0	0.747	0.893	0.977	0.609	0.999
Vacuolar protein sorting 36 family protein(interacts with)Solyc12g096650.1.1	0	0	0	0	0.047	0.937	0.746	0.896	0.998
Vacuolar protein sorting 36 family protein(interacts with)Vacuolar sorting protein SNF8	0	0	0	0	0.098	0.978	0.749	0.926	0.999
Vacuolar protein sorting 36 family protein(interacts with)Vacuolar protein sorting protein 25	0	0	0	0	0.066	0.978	0.749	0.988	0.999
Eukaryotic translation initiation factor 2 alpha subunit family protein expressed(interacts with)30S ribosomal protein S12 chloroplastic	0	0	0	0	0.861	0.903	0.692	0.181	0.996
Eukaryotic translation initiation factor 2 alpha subunit family protein expressed(interacts with)Solyc11g021130.1.1	0	0	0	0	0.861	0.903	0.692	0.181	0.996
Eukaryotic translation initiation factor 2 alpha subunit family protein expressed(interacts with)Eukaryotic translation initiation factor 1A	0	0	0	0	0.291	0.895	0.977	0.468	0.998
Eukaryotic translation initiation factor 2 alpha subunit family protein expressed(interacts with)Eukaryotic translation initiation factor 1A	0	0	0	0	0.291	0.895	0.977	0.468	0.998
Eukaryotic translation initiation factor 2 alpha subunit family protein expressed(interacts with)Eukaryotic translation initiation factor 3 subunit A	0	0	0	0	0.83	0.912	0.999	0.649	0.999
Eukaryotic translation initiation factor 2 alpha subunit family protein expressed(interacts with)Eukaryotic translation initiation factor 2 beta subunit-like	0	0	0	0	0.884	0.978	0.999	0.89	0.999
Eukaryotic translation initiation factor 2 alpha subunit family protein expressed(interacts with)Eukaryotic translation initiation factor 3 subunit A	0	0	0	0	0.83	0.912	0.999	0.649	0.999
SlHVA22b(interacts with)SlHVA22m	0	0	0	0	0.19	0	0	0.319	0.424
SlHVA22d(interacts with)SlHVA22m	0	0	0	0	0.19	0	0	0.319	0.424
SlHVA22d(interacts with)Vacuolar protein sorting protein 25	0	0	0	0	0	0	0	0.555	0.555
SlHVA22d(interacts with)SlHVA22g	0	0	0	0	0.19	0	0	0.578	0.643
RAN binding protein 3(interacts with)Eukaryotic translation initiation factor 1A	0	0	0	0	0.439	0	0	0	0.439
RAN binding protein 3(interacts with)Eukaryotic translation initiation factor 1A	0	0	0	0	0.439	0	0	0	0.439
RAN binding protein 3(interacts with)SlHVA22m	0	0	0	0	0.657	0	0	0	0.657
RAN binding protein 3(interacts with)SlHVA22o	0	0	0	0	0.657	0	0	0	0.657
RAN binding protein 3(interacts with)SlHVA22g	0	0	0	0	0.657	0	0	0	0.657
RAN binding protein 3(interacts with)Ubiquitin-conjugating enzyme 13 E2	0	0	0	0	0.61	0.09	0.27	0.061	0.724
RAN binding protein 3(interacts with)Ubiquitin-conjugating enzyme 13 E2	0	0	0	0	0.61	0.09	0.27	0.061	0.724
RAN binding protein 3(interacts with)Ubiquitin-conjugating enzyme 13 E2	0	0	0	0	0.61	0.09	0.27	0.061	0.724
RAN binding protein 3(interacts with)Ubiquitin-conjugating enzyme 13 E2	0	0	0	0	0.61	0.09	0.27	0.061	0.724
Ubiquitin-conjugating enzyme 13 E2(interacts with)SlHVA22g	0	0	0	0	0.662	0.043	0	0	0.662
Ubiquitin-conjugating enzyme 13 E2(interacts with)SlHVA22o	0	0	0	0	0.662	0.043	0	0	0.662
Ubiquitin-conjugating enzyme 13 E2(interacts with)SlHVA22m	0	0	0	0	0.662	0.043	0	0	0.662
Ubiquitin-conjugating enzyme 13 E2(interacts with)Ran binding protein 3	0	0	0	0	0.61	0.09	0.27	0.061	0.724
Ubiquitin-conjugating enzyme 13 E2(interacts with)Eukaryotic translation initiation factor 1A	0	0	0	0	0.73	0	0	0	0.73
Ubiquitin-conjugating enzyme 13 E2(interacts with)Eukaryotic translation initiation factor 1A	0	0	0	0	0.73	0	0	0	0.73
SlHVA22e(interacts with)SlHVA22g	0	0	0	0	0.19	0	0	0.319	0.424
SlHVA22e(interacts with)SlHVA22o	0	0	0	0	0.19	0	0	0.319	0.424
SlHVA22e(interacts with)SlHVA22m	0	0	0	0	0.19	0	0	0.319	0.424
30S ribosomal protein S12 chloroplastic(interacts with)Eukaryotic translation initiation factor 2 beta subunit-like	0.051	0	0	0	0.38	0.827	0.679	0.276	0.972
30S ribosomal protein S12 chloroplastic(interacts with)Eukaryotic translation initiation factor 3 subunit A	0	0	0	0	0.29	0.896	0.686	0.123	0.976
30S ribosomal protein S12 chloroplastic(interacts with)Eukaryotic translation initiation factor 3 subunit A	0	0	0	0	0.29	0.896	0.686	0.123	0.976
30S ribosomal protein S12 chloroplastic(interacts with)Solyc11g021130.1.1	0.165	0	0.425	0.955	0.86	0.901	0.69	0.509	0.996
30S ribosomal protein S12 chloroplastic(interacts with)Eukaryotic translation initiation factor 1A	0.165	0	0	0	0.837	0.89	0.681	0.513	0.997
30S ribosomal protein S12 chloroplastic(interacts with)Eukaryotic translation initiation factor 1A	0.165	0	0	0	0.837	0.89	0.681	0.513	0.997
SlHVA22f(interacts with)SlHVA22o	0	0	0	0	0.19	0	0	0.319	0.424
SlHVA22f(interacts with)SlHVA22g	0	0	0	0	0.19	0	0	0.319	0.424
SlHVA22f(interacts with)SlHVA22m	0	0	0	0	0.19	0	0	0.319	0.424
SlHVA22g(interacts with)SlHVA22k	0	0	0	0	0.19	0	0	0.319	0.424
SlHVA22g(interacts with)SlHVA22n	0	0	0	0	0.19	0	0	0.319	0.424
SlHVA22g(interacts with)Ran binding protein 3	0	0	0	0	0.657	0	0	0	0.657
SlHVA22g(interacts with)Ubiquitin-conjugating enzyme 13 E2	0	0	0	0	0.662	0.043	0	0	0.662
SlHVA22g(interacts with)Ubiquitin-conjugating enzyme 13 E2	0	0	0	0	0.662	0.043	0	0	0.662
SlHVA22g(interacts with)Ubiquitin-conjugating enzyme 13 E2	0	0	0	0	0.662	0.043	0	0	0.662
SlHVA22g(interacts with)SlHVA22j	0	0	0	0	0.19	0	0	0.612	0.672
SlHVA22g(interacts with)Eukaryotic translation initiation factor 1A	0	0	0	0	0.708	0	0	0	0.708
SlHVA22g(interacts with)Eukaryotic translation initiation factor 1A	0	0	0	0	0.708	0	0	0	0.708
SlHVA22h(interacts with)SlHVA22m	0	0	0	0	0.19	0	0	0.319	0.424
Eukaryotic translation initiation factor 1A(interacts with)Ran binding protein 3	0	0	0	0	0.439	0	0	0	0.439
Eukaryotic translation initiation factor 1A(interacts with)SlHVA22m	0	0	0	0	0.708	0	0	0	0.708
Eukaryotic translation initiation factor 1A(interacts with)SlHVA22o	0	0	0	0	0.708	0	0	0	0.708
Eukaryotic translation initiation factor 1A(interacts with)Ubiquitin-conjugating enzyme 13 E2	0	0	0	0	0.73	0	0	0	0.73
Eukaryotic translation initiation factor 1A(interacts with)Ubiquitin-conjugating enzyme 13 E2	0	0	0	0	0.73	0	0	0	0.73
Eukaryotic translation initiation factor 1A(interacts with)Ubiquitin-conjugating enzyme 13 E2	0	0	0	0	0.73	0	0	0	0.73
Eukaryotic translation initiation factor 1A(interacts with)Eukaryotic translation initiation factor 3 subunit A	0	0	0	0	0.112	0.881	0.933	0.605	0.996
Eukaryotic translation initiation factor 1A(interacts with)Eukaryotic translation initiation factor 3 subunit A	0	0	0	0	0.112	0.881	0.933	0.605	0.996
Eukaryotic translation initiation factor 1A(interacts with)Solyc11g021130.1.1	0.165	0	0	0	0.837	0.89	0.681	0.513	0.997
Eukaryotic translation initiation factor 1A(interacts with)Eukaryotic translation initiation factor 2 beta subunit-like	0.161	0	0	0	0.747	0.893	0.977	0.609	0.999
Ubiquitin-conjugating enzyme 13 E2 (interacts with)SlHVA22m	0	0	0	0	0.662	0.043	0	0	0.662
Ubiquitin-conjugating enzyme 13 E2 (interacts with)SlHVA22o	0	0	0	0	0.662	0.043	0	0	0.662
Ubiquitin-conjugating enzyme 13 E2 (interacts with)Ran binding protein 3	0	0	0	0	0.61	0.09	0.27	0.061	0.724
Ubiquitin-conjugating enzyme 13 E2 (interacts with)Eukaryotic translation initiation factor 1A	0	0	0	0	0.73	0	0	0	0.73
Ubiquitin-conjugating enzyme 13 E2(interacts with)SlHVA22m	0	0	0	0	0.662	0.043	0	0	0.662
Ubiquitin-conjugating enzyme 13 E2(interacts with)SlHVA22o	0	0	0	0	0.662	0.043	0	0	0.662
Ubiquitin-conjugating enzyme 13 E2(interacts with)Ran binding protein 3	0	0	0	0	0.61	0.09	0.27	0.061	0.724
Ubiquitin-conjugating enzyme 13 E2(interacts with)Eukaryotic translation initiation factor 1A	0	0	0	0	0.73	0	0	0	0.73
Ran binding protein 3(interacts with)Eukaryotic translation initiation factor 1A	0	0	0	0	0.439	0	0	0	0.439
Ran binding protein 3(interacts with)SlHVA22m	0	0	0	0	0.657	0	0	0	0.657
Ran binding protein 3(interacts with)SlHVA22o	0	0	0	0	0.657	0	0	0	0.657
Ran binding protein 3(interacts with)Ubiquitin-conjugating enzyme 13 E2	0	0	0	0	0.61	0.09	0.27	0.061	0.724
SlHVA22i(interacts with)SlHVA22m	0	0	0	0	0.19	0	0	0.319	0.424
Eukaryotic translation initiation factor 2 beta subunit-like(interacts with)Solyc11g021130.1.1	0.051	0	0	0	0.38	0.827	0.679	0.276	0.972
Eukaryotic translation initiation factor 2 beta subunit-like(interacts with)Eukaryotic translation initiation factor 3 subunit A	0	0	0	0	0.291	0.912	0.999	0.726	0.999
Eukaryotic translation initiation factor 2 beta subunit-like(interacts with)Eukaryotic translation initiation factor 1A	0.161	0	0	0	0.747	0.893	0.977	0.609	0.999
Eukaryotic translation initiation factor 2 beta subunit-like(interacts with)Eukaryotic translation initiation factor 3 subunit A	0	0	0	0	0.291	0.912	0.999	0.726	0.999
Vacuolar protein sorting protein 25 (interacts with)SlHVA22j	0	0	0	0	0	0	0	0.765	0.765
Vacuolar protein sorting protein 25 (interacts with)Vacuolar sorting protein SNF8	0	0	0	0	0.156	0.978	0.749	0.942	0.999
Vacuolar protein sorting protein 25 (interacts with)Solyc12g096650.1.1	0	0	0	0	0.116	0.978	0.744	0.902	0.999
Ubiquitin-conjugating enzyme 13 E2 (interacts with)SlHVA22m	0	0	0	0	0.662	0.043	0	0	0.662
Ubiquitin-conjugating enzyme 13 E2 (interacts with)SlHVA22o	0	0	0	0	0.662	0.043	0	0	0.662
Ubiquitin-conjugating enzyme 13 E2 (interacts with)Eukaryotic translation initiation factor 1A	0	0	0	0	0.73	0	0	0	0.73
Eukaryotic translation initiation factor 3 subunit A(interacts with)Solyc11g021130.1.1	0	0	0	0	0.29	0.896	0.686	0.123	0.976
Eukaryotic translation initiation factor 3 subunit A(interacts with)Eukaryotic translation initiation factor 1A	0	0	0	0	0.112	0.881	0.841	0.605	0.992
Vacuolar sorting protein SNF8(interacts with)Solyc12g096650.1.1	0	0	0	0	0.103	0.921	0.742	0.89	0.997
SlHVA22j(interacts with)SlHVA22m	0	0	0	0	0.19	0	0	0.319	0.424
SlHVA22j(interacts with)SlHVA22o	0	0	0	0	0.19	0	0	0.612	0.672
Eukaryotic translation initiation factor 1A(interacts with)SlHVA22m	0	0	0	0	0.708	0	0	0	0.708
Eukaryotic translation initiation factor 1A(interacts with)SlHVA22o	0	0	0	0	0.708	0	0	0	0.708
Eukaryotic translation initiation factor 1A(interacts with)Eukaryotic translation initiation factor 3 subunit A	0	0	0	0	0.112	0.881	0.841	0.605	0.992
Eukaryotic translation initiation factor 1A(interacts with)Solyc11g021130.1.1	0.165	0	0	0	0.837	0.89	0.681	0.513	0.997
SlHVA22k(interacts with)SlHVA22m	0	0	0	0	0.19	0	0	0.319	0.424
SlHVA22k(interacts with)SlHVA22o	0	0	0	0	0.19	0	0	0.319	0.424
SlHVA22m(interacts with)SlHVA22n	0	0	0	0	0.19	0	0	0.319	0.424
Eukaryotic translation initiation factor 3 subunit A(interacts with)Solyc11g021130.1.1	0	0	0	0	0.29	0.896	0.686	0.123	0.976
SlHVA22n(interacts with)SlHVA22o	0	0	0	0	0.19	0	0	0.319	0.424
