# Supplementary material for: Genome-wide identification and analysis of the evolution and expression pattern of the HVA22 gene family in three wild species of tomatoes
Source: PeerJ. 2023 Feb 13;11:e14844. doi: 10.7717/peerj.14844 (PMC9933743; doi:10.7717/peerj.14844)
Supplement: Table S7 [file peerj-11-14844-s008.xlsx]

## Sheet: Sheet9
Table S7.qRT-PCR expression analysis data under abiotic stress.
SpiHVA22c	actin CT	gene CT		SpiHVA22d	actin CT	gene CT		SpiHVA22g	actin CT	gene CT		SpiHVA22k	actin CT	gene CT		SpiHVA22j	actin CT	gene CT
NaCl 0h	15.88	22.92		NaCl 0h	15.88	19.88		NaCl 0h	15.88	20.35		NaCl 0h	15.88	21.79		NaCl 0h	15.88	20.62
NaCl 0h	15.98	22.88		NaCl 0h	15.98	19.87		NaCl 0h	15.98	20.4		NaCl 0h	15.98	21.77		NaCl 0h	15.98	20.68
NaCl 0h	15.94	22.82		NaCl 0h	15.94	19.86		NaCl 0h	15.94	20.33		NaCl 0h	15.94	21.76		NaCl 0h	15.94	20.7
NaCl 2h	17	22.75		NaCl 2h	17	19.95		NaCl 2h	17	20.12		NaCl 2h	17	21.91		NaCl 2h	17	20.78
NaCl 2h	17.07	22.74		NaCl 2h	17.07	19.94		NaCl 2h	17.07	20.19		NaCl 2h	17.07	21.92		NaCl 2h	17.07	20.81
NaCl 2h	17.1	22.75		NaCl 2h	17.1	19.93		NaCl 2h	17.1	20.21		NaCl 2h	17.1	21.96		NaCl 2h	17.1	20.85
NaCl 6h	15.3	20.82		NaCl 6h	15.3	17.95		NaCl 6h	15.3	17.98		NaCl 6h	15.3	19.38		NaCl 6h	15.3	20.36
NaCl 6h	15.41	20.87		NaCl 6h	15.41	18.01		NaCl 6h	15.41	18.1		NaCl 6h	15.41	19.49		NaCl 6h	15.41	20.5
NaCl 6h	15.3	20.85		NaCl 6h	15.3	17.96		NaCl 6h	15.3	17.97		NaCl 6h	15.3	19.39		NaCl 6h	15.3	20.38
NaCl 12h	14.73	20.15		NaCl 12h	14.73	16.88		NaCl 12h	14.73	17.71		NaCl 12h	14.73	18.5		NaCl 12h	14.73	20.16
NaCl 12h	14.72	20.16		NaCl 12h	14.72	16.83		NaCl 12h	14.72	17.72		NaCl 12h	14.72	18.51		NaCl 12h	14.72	20.14
NaCl 12h	14.64	20.09		NaCl 12h	14.64	16.84		NaCl 12h	14.64	17.68		NaCl 12h	14.64	18.35		NaCl 12h	14.64	20.11
NaCl 24h	16.4	22.02		NaCl 24h	16.4	19.44		NaCl 24h	16.4	19.89		NaCl 24h	16.4	21.06		NaCl 24h	16.4	21.21
NaCl 24h	16.39	21.98		NaCl 24h	16.39	19.42		NaCl 24h	16.39	19.85		NaCl 24h	16.39	21.02		NaCl 24h	16.39	21.22
NaCl 24h	16.46	22.04		NaCl 24h	16.46	19.48		NaCl 24h	16.46	19.91		NaCl 24h	16.46	21.05		NaCl 24h	16.46	21.23
PEG6000 0h	15.2	22.94		PEG6000 0h	15.2	19.32		PEG6000 0h	15.2	19.78		PEG6000 0h	15.2	21.66		PEG6000 0h	15.2	20.39
PEG6000 0h	15.21	22.93		PEG6000 0h	15.21	19.31		PEG6000 0h	15.21	19.73		PEG6000 0h	15.21	21.65		PEG6000 0h	15.21	20.41
PEG6000 0h	15.24	23.01		PEG6000 0h	15.24	19.29		PEG6000 0h	15.24	19.75		PEG6000 0h	15.24	21.67		PEG6000 0h	15.24	20.42
PEG6000 2h	16.03	22.55		PEG6000 2h	16.03	19.11		PEG6000 2h	16.03	19.3		PEG6000 2h	16.03	21.52		PEG6000 2h	16.03	20.2
PEG6000 2h	16.05	22.53		PEG6000 2h	16.05	19.16		PEG6000 2h	16.05	19.3		PEG6000 2h	16.05	21.55		PEG6000 2h	16.05	20.28
PEG6000 2h	16.08	22.54		PEG6000 2h	16.08	19.14		PEG6000 2h	16.08	19.38		PEG6000 2h	16.08	21.59		PEG6000 2h	16.08	20.27
PEG6000 6h	16.77	23.03		PEG6000 6h	16.77	19.55		PEG6000 6h	16.77	19.58		PEG6000 6h	16.77	21.46		PEG6000 6h	16.77	22.44
PEG6000 6h	16.71	23.02		PEG6000 6h	16.71	19.46		PEG6000 6h	16.71	19.55		PEG6000 6h	16.71	21.45		PEG6000 6h	16.71	22.42
PEG6000 6h	16.72	23.04		PEG6000 6h	16.72	19.51		PEG6000 6h	16.72	19.5		PEG6000 6h	16.72	21.41		PEG6000 6h	16.72	22.4
PEG6000 12h	17.12	23.36		PEG6000 12h	17.12	19.43		PEG6000 12h	17.12	20.21		PEG6000 12h	17.12	21.46		PEG6000 12h	17.12	22.91
PEG6000 12h	17.13	23.31		PEG6000 12h	17.13	19.45		PEG6000 12h	17.13	20.27		PEG6000 12h	17.13	21.48		PEG6000 12h	17.13	22.94
PEG6000 12h	17.14	23.38		PEG6000 12h	17.14	19.43		PEG6000 12h	17.14	20.22		PEG6000 12h	17.14	21.49		PEG6000 12h	17.14	23.01
PEG6000 24h	16.53	22.95		PEG6000 24h	16.53	19.75		PEG6000 24h	16.53	20.15		PEG6000 24h	16.53	21.75		PEG6000 24h	16.53	21.78
PEG6000 24h	16.52	22.92		PEG6000 24h	16.52	19.72		PEG6000 24h	16.52	20.15		PEG6000 24h	16.52	21.76		PEG6000 24h	16.52	21.81
PEG6000 24h	16.54	22.96		PEG6000 24h	16.54	19.73		PEG6000 24h	16.54	20.12		PEG6000 24h	16.54	21.75		PEG6000 24h	16.54	21.82
ABA 0h	15.77	22.85		ABA 0h	15.77	20.18		ABA 0h	15.77	20.68		ABA 0h	15.77	22.31		ABA 0h	15.77	20.72
ABA 0h	15.87	22.88		ABA 0h	15.87	20.14		ABA 0h	15.87	20.68		ABA 0h	15.87	22.32		ABA 0h	15.87	20.76
ABA 0h	15.82	22.81		ABA 0h	15.82	20.21		ABA 0h	15.82	20.63		ABA 0h	15.82	22.35		ABA 0h	15.82	20.78
ABA 2h	16.66	23.16		ABA 2h	16.66	21.15		ABA 2h	16.66	21.13		ABA 2h	16.66	22.41		ABA 2h	16.66	21.02
ABA 2h	16.74	23.25		ABA 2h	16.74	21.14		ABA 2h	16.74	21.19		ABA 2h	16.74	22.49		ABA 2h	16.74	21.03
ABA 2h	16.71	23.21		ABA 2h	16.71	21.16		ABA 2h	16.71	21.13		ABA 2h	16.71	22.43		ABA 2h	16.71	21.01
ABA 6h	16.2	22.07		ABA 6h	16.2	20.51		ABA 6h	16.2	20.14		ABA 6h	16.2	21.51		ABA 6h	16.2	20.2
ABA 6h	16.29	22.12		ABA 6h	16.29	20.52		ABA 6h	16.29	20.22		ABA 6h	16.29	21.55		ABA 6h	16.29	20.23
ABA 6h	16.3	22.11		ABA 6h	16.3	20.51		ABA 6h	16.3	20.27		ABA 6h	16.3	21.52		ABA 6h	16.3	20.26
ABA 12h	16.14	22.53		ABA 12h	16.14	20.46		ABA 12h	16.14	20.41		ABA 12h	16.14	22.09		ABA 12h	16.14	20.47
ABA 12h	16.13	22.53		ABA 12h	16.13	20.51		ABA 12h	16.13	20.42		ABA 12h	16.13	22		ABA 12h	16.13	20.45
ABA 12h	16.17	22.55		ABA 12h	16.17	20.52		ABA 12h	16.17	20.43		ABA 12h	16.17	22.04		ABA 12h	16.17	20.41
ABA 24h	15.71	22.45		ABA 24h	15.71	19.97		ABA 24h	15.71	20.09		ABA 24h	15.71	21.89		ABA 24h	15.71	20.75
ABA 24h	15.68	22.49		ABA 24h	15.68	19.96		ABA 24h	15.68	20.08		ABA 24h	15.68	21.85		ABA 24h	15.68	20.71
ABA 24h	15.7	22.46		ABA 24h	15.7	19.95		ABA 24h	15.7	20.05		ABA 24h	15.7	21.83		ABA 24h	15.7	20.73
MeJA 0h	16.31	23.51		MeJA 0h	16.31	20.31		MeJA 0h	16.31	22.82		MeJA 0h	16.31	22.48		MeJA 0h	16.31	22.24
MeJA 0h	16.29	23.49		MeJA 0h	16.29	20.32		MeJA 0h	16.29	22.84		MeJA 0h	16.29	22.51		MeJA 0h	16.29	22.29
MeJA 0h	16.41	23.53		MeJA 0h	16.41	20.36		MeJA 0h	16.41	22.88		MeJA 0h	16.41	22.49		MeJA 0h	16.41	22.28
MeJA 2h	16.66	23.23		MeJA 2h	16.66	20.49		MeJA 2h	16.66	24.94		MeJA 2h	16.66	22.28		MeJA 2h	16.66	22.89
MeJA 2h	16.71	23.29		MeJA 2h	16.71	20.48		MeJA 2h	16.71	24.93		MeJA 2h	16.71	22.31		MeJA 2h	16.71	22.94
MeJA 2h	16.72	23.32		MeJA 2h	16.72	20.51		MeJA 2h	16.72	24.97		MeJA 2h	16.72	22.33		MeJA 2h	16.72	22.91
MeJA 6h	16.95	22.84		MeJA 6h	16.95	20.41		MeJA 6h	16.95	24.39		MeJA 6h	16.95	22.41		MeJA 6h	16.95	23.61
MeJA 6h	16.92	22.91		MeJA 6h	16.92	20.42		MeJA 6h	16.92	24.35		MeJA 6h	16.92	22.42		MeJA 6h	16.92	23.59
MeJA 6h	17.01	22.95		MeJA 6h	17.01	20.43		MeJA 6h	17.01	24.36		MeJA 6h	17.01	22.43		MeJA 6h	17.01	23.58
MeJA 12h	16.81	22.89		MeJA 12h	16.81	20.62		MeJA 12h	16.81	25.71		MeJA 12h	16.81	22.58		MeJA 12h	16.81	24.11
MeJA 12h	16.88	22.82		MeJA 12h	16.88	20.64		MeJA 12h	16.88	25.75		MeJA 12h	16.88	22.59		MeJA 12h	16.88	24.07
MeJA 12h	16.82	22.91		MeJA 12h	16.82	20.65		MeJA 12h	16.82	25.77		MeJA 12h	16.82	22.58		MeJA 12h	16.82	24.12
MeJA 24h	16.35	22.21		MeJA 24h	16.35	19.74		MeJA 24h	16.35	22.89		MeJA 24h	16.35	21.65		MeJA 24h	16.35	24.22
MeJA 24h	16.39	22.19		MeJA 24h	16.39	19.75		MeJA 24h	16.39	22.88		MeJA 24h	16.39	21.68		MeJA 24h	16.39	24.23
MeJA 24h	16.42	22.23		MeJA 24h	16.42	19.78		MeJA 24h	16.42	22.87		MeJA 24h	16.42	21.63		MeJA 24h	16.42	24.25
